# Supplementary material
Source: PubMed Central journal article supplement (PMC2117601)
Supplement: jnnpsyc_jnnp.2006.111161_1.pdf [file jnnpsyc_jnnp.2006.111161_1.pdf]

**Supplementary Table S1.**Overall Rasch model fit statistics and reliability of PDQ-39 scales <sup>a</sup>

| Overall fit statistics <sup>b</sup>  | PDQ-39 scales |        |        |        |        |        |        |        |
|--------------------------------------|---------------|--------|--------|--------|--------|--------|--------|--------|
|                                      | MOB           | ADL    | EMO    | STI    | SOC    | COG    | COM    | BOD    |
| <i>Items</i>                         |               |        |        |        |        |        |        |        |
| Fit residual (mean) <sup>c</sup>     | 0.031         | 0.037  | 0.372  | 0.428  | 0.245  | 0.703  | -0.148 | 0.310  |
| Fit residual (SD) <sup>d</sup>       | 1.481         | 1.842  | 1.329  | 1.152  | 1.442  | 1.144  | 2.301  | 0.897  |
| <i>Persons</i>                       |               |        |        |        |        |        |        |        |
| Fit residual (mean) <sup>c</sup>     | -0.350        | -0.290 | -0.379 | -0.406 | -0.555 | -0.290 | -0.591 | -0.288 |
| Fit residual (SD) <sup>d</sup>       | 1.266         | 1.006  | 1.098  | 1.230  | 1.281  | 1.088  | 1.336  | 0.849  |
| <i>Total item-trait interaction</i>  |               |        |        |        |        |        |        |        |
| Total item chi-square                | 41.046        | 39.275 | 10.081 | 13.021 | 17.199 | 14.054 | 16.729 | 10.779 |
| df                                   | 20            | 12     | 12     | 8      | 6      | 8      | 6      | 6      |
| P-value                              | 0.004         | <0.001 | 0.609  | 0.111  | 0.008  | 0.080  | 0.010  | 0.095  |
| Person separation index <sup>e</sup> | 0.96          | 0.90   | 0.90   | 0.85   | 0.72   | 0.71   | 0.88   | 0.71   |

<sup>a</sup> As analysed using RUMM2020 (Rumm Laboratory Pty Ltd., Perth) for Windows.<sup>b</sup> Data are rounded to two decimals.<sup>c</sup> Should be close to 0 (Andrich *et al.*, 2004-2005).<sup>d</sup> Should be close to 1 (Andrich *et al.*, 2004-2005).<sup>e</sup> Rasch based reliability statistic (analogous to Cronbach's alpha).

SD, standard deviation; df, degrees of freedom; MOB, mobility; ADL, activities of daily living; EMO, emotional well-being; STI, stigma; SOC, social support; COG, cognitions; COM, communication; BOD, bodily discomfort.

**Reference**

Andrich D, Sheridan B, Luo G. Interpreting RUMM2020. Perth, WA: RUMM Laboratory Pty Ltd; 2004–2005.
